# Supplementary material
Source: PubMed Central journal article supplement (PMC4224615)
Supplement: NIHMS607980-supplement-1.pdf [file NIHMS607980-supplement-1.pdf]

## Supplementary Information

### **Broad and potent HIV-1 neutralization by a human antibody that binds the gp41-120 interface**

Jinghe Huang<sup>1</sup>, Byong H. Kang<sup>1</sup>, Marie Pancera<sup>2</sup>, Jeong Hyun Lee<sup>3,4</sup>, Tommy Tong<sup>5</sup>, Yu Feng<sup>4</sup>, Ivelin S. Georgiev<sup>2</sup>, Gwo-Yu Chuang<sup>2</sup>, Aliaksandr Druz<sup>2</sup>, Nicole A. Doria-Rose<sup>2</sup>, Leo Laub<sup>1</sup>, Kwinten Sliepen<sup>6</sup>, Marit van Gils<sup>6</sup>, Alba Torrents de la Peña<sup>6</sup>, Ronald Derking<sup>6</sup>, Per-Johan Klasse<sup>7</sup>, Stephen A. Migueles<sup>1</sup>, Robert T. Bailer<sup>2</sup>, Munir Alam<sup>8</sup>, Pavel Pugach<sup>7</sup>, Barton F. Haynes<sup>8</sup>, Richard T. Wyatt<sup>4</sup>, Rogier W. Sanders<sup>6,7</sup>, James M. Binley<sup>5</sup>, Andrew B. Ward<sup>3,4</sup>, John R. Mascola<sup>2</sup>, Peter D. Kwong<sup>2</sup> & Mark Connors<sup>1#</sup>

<sup>#</sup>To whom correspondence should be addressed

### **Table of Contents**

*Supplementary Tables (PDF format)*

1. 35O22 neutralizing breadth and potency.
  - a. Neutralization by 35O22 and its variants against an 8-isolate Env-pseudovirus mini-panel.
  - b. Neutralization profile of patient N152 serum and monoclonal antibodies.
2. Amino acid sequences of the variable regions of 35O22 and its variants.
3. Antibody neutralization data against 181 HIV-1 Env-pseudoviruses.
4. 35O22 neutralization of pseudotyped HIV<sub>JRC5F</sub> alanine mutants.
5. 35O22 neutralization of HIV<sub>LAI</sub> alanine mutants.
6. Data collection and refinement statistics for 35O22 Fab
7. 35O22 neutralizing activity with reversion of an 8 amino acid FR3 insertion to germline
8. Conservation of N-linked glycosylation sequons in HIV-1 Env.

Supplementary Table 1. 35O22 neutralizing breadth and potency.

**a. Neutralization by 35O22 and its variants against an 8-isolate Env-pseudovirus mini-panel.**

| Virus ID | Antibody variants |       |       |       |       |       |       |       |
|----------|-------------------|-------|-------|-------|-------|-------|-------|-------|
|          | 35O22             | 7B9   | 4O20  | 10J4  | 7K3   | 13110 | 2N5   | 10M6  |
| Q168.a2  | 0.009             | 3.7   | >20   | >20   | 3.28  | >20   | >20   | >20   |
| RW020.2  | 0.010             | 0.853 | 0.041 | >20   | >20   | >20   | >20   | >20   |
| Q769.h55 | 0.004             | 0.593 | >20   | >20   | >20   | >20   | >20   | >20   |
| JRFL.JB  | 0.013             | 1.36  | 0.073 | 3.93  | >20   | >20   | 0.098 | >20   |
| THRO.18  | 0.908             | >20   | >20   | >20   | >20   | >20   | >20   | >20   |
| CAAN.A2  | 0.003             | 0.212 | 0.007 | 0.006 | 0.004 | 0.005 | >20   | 0.003 |
| ZAO12.29 | >20               | >20   | >20   | >20   | >20   | 13.8  | >20   | >20   |
| DU156.12 | >20               | >20   | >20   | >20   | >20   | >20   | >20   | >20   |

<sup>a</sup> IC<sub>50</sub><1µg/ml is highlighted in red, 1<IC<sub>50</sub><10 µg/ml in yellow, and 10<IC<sub>50</sub><50 µg/ml in green.

**b. Neutralization profile of patient N152 serum and monoclonal antibodies.**

| Clade                                                  | Virus ID      | Serum <sup>a</sup> | Monoclonal antibody <sup>b</sup> |       |       |        |        |
|--------------------------------------------------------|---------------|--------------------|----------------------------------|-------|-------|--------|--------|
|                                                        |               | N152               | 35O22                            | 10E8  | VRC01 | PG9    | PGT121 |
| A                                                      | KER2018       | 397                | 0.004                            | 2.71  | 0.070 | 0.0009 | >50    |
|                                                        | RWO20.2       | 1341               | 0.010                            | 1.30  | 0.303 | 0.103  | 0.002  |
|                                                        | Q168.a2       | 509                | 0.009                            | 0.768 | 0.140 | 0.106  | >50    |
|                                                        | Q769.d22      | 1834               | 0.002                            | 1.11  | 0.015 | 0.007  | >50    |
|                                                        | Q769.h5       | 836                | 0.004                            | 2.74  | 0.014 | 0.002  | >50    |
| B                                                      | JRFL.JB       | 860                | 0.013                            | 0.247 | 0.033 | >50    | 0.017  |
|                                                        | BaL.01        | 1590               | 0.003                            | 0.715 | 0.102 | 0.052  | 0.011  |
|                                                        | YU2.DG        | 279                | 0.287                            | 0.895 | 0.055 | 3.69   | 0.068  |
|                                                        | PVO.04        | 359                | 0.011                            | 1.78  | 0.386 | 6.24   | 0.132  |
|                                                        | TRO.11        | 2773               | >50                              | 0.026 | 0.343 | 41.5   | 0.006  |
|                                                        | CAAN.A2       | 1364               | 0.003                            | 1.37  | 1.06  | 13.0   | 0.005  |
|                                                        | TRJO.58       | 1231               | 0.002                            | 0.881 | 0.079 | 0.246  | 4.31   |
|                                                        | THRO.18       | 351                | 0.908                            | 0.048 | 4.42  | 15.0   | >50    |
|                                                        | BG1168.1      | 167                | >50                              | 0.136 | 0.449 | >50    | >50    |
|                                                        | 6101.1        | 1372               | >50                              | 0.009 | 0.104 | >50    | 0.002  |
| C                                                      | ZAO12.29      | 39                 | >50                              | 0.827 | 0.250 | 27.0   | 0.005  |
|                                                        | DU156.12      | 2021               | 11.7                             | 0.007 | 0.082 | 0.023  | 0.005  |
|                                                        | DU422.01      | 325                | 0.021                            | 1.06  | >50   | 0.303  | 0.164  |
|                                                        | ZM106.9       | 256                | 0.372                            | >50   | 0.248 | 0.639  | 0.005  |
|                                                        | ZM55.28a      | 85                 | 1.93                             | 2.31  | 0.144 | 0.571  | 0.070  |
| Control                                                | SIVmac251.SG3 | 5                  | >50                              | >50   | >50   | >50    | >50    |
| Geometric Mean IC <sub>50</sub> (µg ml <sup>-1</sup> ) |               |                    | 0.031                            | 0.417 | 0.149 | 0.355  | 0.020  |
| Median IC <sub>50</sub> (µg ml <sup>-1</sup> )         |               |                    | 0.010                            | 0.881 | 0.140 | 0.303  | 0.009  |

<sup>a</sup>The data for N152 shows the ID<sub>50</sub> of serum against each virus. ID<sub>50</sub>>1000 is highlighted in red, 500<ID<sub>50</sub><1000 is in orange, and 100<ID<sub>50</sub><500 is in yellow. <sup>b</sup>The data for the monoclonal antibodies shows the IC<sub>50</sub>. IC<sub>50</sub><0.1µg ml<sup>-1</sup> is in red, 0.1<IC<sub>50</sub><1µg ml<sup>-1</sup> is in orange, 1<IC<sub>50</sub><10 µg ml<sup>-1</sup> is in yellow, and 10<IC<sub>50</sub><50 µg ml<sup>-1</sup> is in green.

**Supplementary Table 2. Amino acid sequences of the variable regions of 35022 and its variants.**

|             | 1                               | 10    | 20             | 30        | 40  | 5052A | 57   |
|-------------|---------------------------------|-------|----------------|-----------|-----|-------|------|
| Heavy Chain | FR1                             |       | CDR1           |           | FR2 |       | CDR2 |
| IGHV1-18*02 | QVQLVQSGAEVKKPGASVKVSKASGYTFT   | SYGIS | WVRQAPGQGLEWMG | WISAYNGNT |     |       |      |
| 10J4        | QGQLVQSGGELKKPGASVKISCKTSGYRFS  | FYHIN | WIRQLVGRGPEWMG | WISFYNGGT |     |       |      |
| 10M6        | QGQLVQSGGELKRRPGASVKISCKTSGYRFS | SYHIN | WIRQVIGRGPEWMG | WISFYSGGT |     |       |      |
| 13I10       | QGQLVQSGGELKKPGASVKISCKTSGYRFS  | FYHIN | WIRQVVRGPEWMG  | WISFYNGGT |     |       |      |
| 7K3         | QGQLVQSGGELKKPGASVKISCKTSGYRFS  | FYHIN | WIRQVSGRPEWMG  | WISFYSGDT |     |       |      |
| 2N5         | QGQLVQSGAELKKPGASVKISCKTSGYKFS  | FFHIN | WIRQTAGRPEWLG  | WISFYSGDK |     |       |      |
| 4020        | QGQLVQSGAELKKPGGSVKISCKTSGYRFN  | FYHIN | WIRQTAGRPEWMG  | WISFYSGDK |     |       |      |
| 7B9         | QGQLVQSGAELKKPGDSVKISCKTSGYRFN  | FYHIN | WIRQTAGRPEWMG  | WISFYSGDK |     |       |      |
| 35022       | QGQLVQSGAELKKPGASVKISCKTSGYRFN  | FYHIN | WIRQTAGRPEWMG  | WISFYSGDK |     |       |      |

  

|             | 60       | 7072ABCDEFGH                              | 8082ABC        | 90          | 100ABCDEFG | 103 | 110          |
|-------------|----------|-------------------------------------------|----------------|-------------|------------|-----|--------------|
| Heavy Chain | CDR2     |                                           | FR3            |             | CDR3       |     | FR4 (HJ4*02) |
| IGHV1-18*02 | NYAQLQG  | RVTMTTD-----TSTSTAYMELRSLRSDDTAVYYCAR     | RDGYNYYFDY     | WGQGTLLTVSS |            |     |              |
| 10J4        | NLAPELRG | RLVLTTEREVVDTMTLSTGTAHMELRNLRSDDTGIYFCAK  | GLLRDGSSTWLPHL | WGQGTLLTVSS |            |     |              |
| 10M6        | NLAPEFRG | RLVLTTEREVVDTMTLSTGTAHMELRNLRSDDTGIYFCAK  | GLLRDGSSTWLPHL | WGQGTLLTVSS |            |     |              |
| 13I10       | NLAPEFRG | RLVLTTEREVVDTMTMSTGTAHMELRNLRSDDTGLYFCAK  | GLLRDGPSTWLPHL | WGQGTLLTVSS |            |     |              |
| 7K3         | NLAPDFRG | RVVLTTRDEVVDTMTMSTGTAHMELRNLRSDDTGLYFCAK  | GLLRDGSSTWLPHL | WGQGTLLTVSS |            |     |              |
| 2N5         | NYAPAFQD | RVIMTTDKVEPVTSFTSTGTAYLEIRSLKPDFTGIYFCAR  | GLLRDGSSTWLPYL | WGQGTLLTVSS |            |     |              |
| 4020        | NLAPAFQD | RVIMTTDKVEPVTAFTSTGTAYMEIRNLKFDFTGIYFCAR  | GLLRDGSSTWLPYL | WGQGTLLTVSS |            |     |              |
| 7B9         | NLAPAFQD | RVIMTTDNEVPVTAFTSTGTAYMEIRNLRFDDTGIYFCAR  | GLLRDGSSTWLPYL | WGQGTLLTVSS |            |     |              |
| 35022       | NLAPAFQD | RVIMTTDTEVPVTSFTSTGAAYMEIRNLKFDFTGTIYFCAR | GLLRDGSSTWLPYL | WGQGTLLTVSS |            |     |              |

  

|             | 1                   | 10  | 20             | 27ABC           | 30  | 40 | 50 |
|-------------|---------------------|-----|----------------|-----------------|-----|----|----|
| Light Chain | FR1                 |     | CDR1           |                 | FR2 |    | CD |
| IGLV2-14*02 | QSALTQPAS.VSGSPGQSI | TIS | TGTSSDVGSYNLVS | WYQQHPGKAPKLMII | EGS |    |    |
| 10J4        | QSALTQPAS.VSGSLGQSV | TIS | TGPSSVCCSHKSI  | WYQWPPGRAPTLII  | EDS |    |    |
| 10M6        | QSALTQPAS.VSGSLGQSV | TIS | TGPSSVCCSHKSI  | WYQWPPGRAPTLII  | EDS |    |    |
| 13I10       | QSALTQPAS.VSGSLGQSV | TIS | TGPSSVCCSHKSI  | WYQWPPGRAPTLII  | EDS |    |    |
| 7K3         | QSALTQPAS.VSGSLGQSV | TIS | TGPNSVCCSHKSI  | WYQWPPGRAPTLII  | EDS |    |    |
| 2N5         | QPVLTQPAS.VSGSLGQSV | TIS | TGPSSVCCSHKSI  | WYRWPPGRAPTLII  | EDN |    |    |
| 4020        | QSALTQPAS.VSGSLGQSV | TIS | TGPNSVCCSHKSI  | WYQWPPGRAPTLII  | EDN |    |    |
| 7B9         | QSALTQPAS.VSGSLGQSV | TIS | TGPNSVCCSHKSI  | WYQWPPGRAPTLII  | EDN |    |    |
| 35022       | QSVLTQAS.VSGSLGQSV  | TIS | TGPNSVCCSHKSI  | WYQWPPGRAPTLII  | EDN |    |    |

  

|             | 60   | 70                               | 80         | 90         | 95A          | 100 | 106A |
|-------------|------|----------------------------------|------------|------------|--------------|-----|------|
| Light Chain | FR3  |                                  | CDR3       |            | FR4 (LJ1*01) |     |      |
| IGLV2-14*02 | KRPS | GVSNRFSGSKSGNTASLTISGLQAEDEADYYC | SSYTSSSTLV | FGTGTKVTVL |              |     |      |
| 10J4        | ERSW | GISDRFSGYKSYWSASLTISNLRPEDETTYC  | CSYTHNSGCV | FGTGTNVSVL |              |     |      |
| 10M6        | ERSW | GISDRFSGYKSYWSASLTISNLRPEDETTYC  | CSYTHNSGCV | FGTGTKVSVL |              |     |      |
| 13I10       | ERSW | GISDRFSGYKSYWSASLTISNLRPEDETTYC  | CSYTHNSGCV | FGTGTKVSVL |              |     |      |
| 7K3         | ERSW | GISDRFSGYKSYWSASLTISNLRPEDETTYC  | CSYTHNSGCV | FGTGTKVSVL |              |     |      |
| 2N5         | KRFS | EISPRFSGYKSYWSAYLTISDLRPEDETTYC  | CSYTHNSGCV | FATGTKVSVL |              |     |      |
| 4020        | EKAP | GISHRFSGYKSYWSAYLTISDLRPEDETTYC  | CSYTHNSGCV | FGTGTKVSVL |              |     |      |
| 7B9         | EKAP | GISHRFSGYKSYWSAYLTISDLRPEDETTYC  | CSYTHNSGCV | FGTGTKVSVL |              |     |      |
| 35022       | ERAP | GISPRFSGYKSYWSAYLTISDLRPEDETTYC  | CSYTHNSGCV | FGTGTKVSVL |              |     |      |

Residues in red represent substitutions from the germline sequence. The dot symbol denotes the residue deletion. Kabat numbering is used to identify specific residues in the 35022 heavy and light chains.

**Supplementary Table 3. Antibody neutralization data against 181 HIV-1 Env-pseudoviruses.**

| Virus ID     | Clade | ID50 <sup>a</sup> |        |        |       | IC50 (µg ml <sup>-1</sup> ) <sup>b</sup> |           |          |        |        |        |        |  |
|--------------|-------|-------------------|--------|--------|-------|------------------------------------------|-----------|----------|--------|--------|--------|--------|--|
|              |       | N152              | 35O22  | 10E8   | 4E10  | VRC01                                    | NIH 45-46 | 3BNC 117 | PG9    | PG16   | PGT121 | PGT128 |  |
| 0260.v5.c36  | A     | 3906              | 0.393  | 8.96   | 31.7  | 0.529                                    | 0.397     | 0.200    | 2.18   | 2.10   | 0.039  | 0.062  |  |
| 0330.v4.c3   | A     | 9263              | 0.736  | 1.27   | 6.86  | 0.064                                    | 0.049     | 0.013    | 0.018  | 0.006  | 0.041  | 1.09   |  |
| 0439.v5.c1   | A     | 4111              | 0.118  | 0.924  | 8.24  | 0.052                                    | 0.185     | 0.215    | >50    | >50    | >50    | 6.41   |  |
| 3365.v2.c20  | A     | 9810              | 0.780  | 2.45   | 1.38  |                                          | 0.038     | 0.011    |        |        | 0.059  | >50    |  |
| 3415.v1.c1   | A     | 12934             | 6.99   | 6.61   | 11.5  | 0.092                                    | 0.082     | 0.094    | 0.149  | 0.036  | >50    | 0.018  |  |
| 3718.v3.c11  | A     | 2167              | >50    | 1.63   | 8.55  | 0.218                                    | 0.871     | >50      | 0.050  | 0.019  | 1.40   | >50    |  |
| 398-F1_F6_20 | A     | 11290             | >50    | 0.942  | 0.784 | 0.058                                    | 0.157     | 0.071    | >50    | >50    | 0.002  | 0.002  |  |
| BB201.B42    | A     | 470               | 1.73   | 0.231  | 2.19  | 0.343                                    | 0.303     | 3.35     | 0.014  | 0.003  | 0.003  | 0.004  |  |
| BB539.2B13   | A     | 1947              | 3.91   | 1.00   | 0.712 | 0.094                                    | 0.022     | 0.033    | 0.106  | 0.012  | >50    | >50    |  |
| BI369.9A     | A     | 6422              | 0.003  | 0.135  | 1.36  | 0.149                                    | 0.043     | 0.020    | 0.029  | 0.007  | 0.008  | 0.030  |  |
| BS208.B1     | A     | 9293              | >50    | 0.127  | 0.618 | 0.029                                    | 0.006     | 0.002    | 0.031  | 0.004  | >50    | >50    |  |
| KER2008.12   | A     | 8198              | 0.0008 | >50    | 1.28  | 0.563                                    | 0.567     | 0.248    | 0.017  | 0.006  | 2.22   | 14.7   |  |
| KER2018.11   | A     | 397               | 0.004  | 2.71   | 8.46  | 0.070                                    | 0.828     | 0.417    | 0.0009 | 0.0006 | >50    | >50    |  |
| KNH1209.18   | A     | 2457              | 0.103  | 0.422  | 1.63  | 0.087                                    | 0.246     | 0.040    | 0.367  | 0.678  | 0.002  | 0.006  |  |
| MB201.A1     | A     | 4508              | 7.85   | 0.230  | 2.21  | 0.237                                    | 0.165     | 0.464    | 0.024  | 0.001  | 0.005  | 0.016  |  |
| MB539.2B7    | A     | 726               | 0.257  | 8.03   | 21.7  | 0.544                                    | 0.402     | 0.087    | 0.058  | 0.025  | >50    | 3.57   |  |
| MI369.A5     | A     | 2259              | 0.005  | 0.617  | 2.88  | 0.162                                    | 0.074     | 0.033    | 0.058  | 0.011  | 0.022  | 0.020  |  |
| MS208.A1     | A     | 14167             | >50    | 0.254  | 1.56  | 0.147                                    | 0.090     | 0.019    | 0.071  | 0.047  | >50    | >50    |  |
| Q23.17       | A     | 5898              | 0.002  | 0.350  | 0.132 | 0.086                                    | 0.106     | 0.017    | 0.007  | 0.002  | 0.004  | 0.013  |  |
| Q259.17      | A     | 953               | 1.92   | 3.22   | 10.2  | 0.051                                    | 0.046     | 0.017    | 0.045  | 0.028  | >50    | >50    |  |
| Q461.e2      | A     | 4282              | 0.001  | 1.62   | 5.53  | 0.410                                    | 0.212     | 0.069    | 3.01   | 4.11   |        |        |  |
| Q769.d22     | A     | 1834              | 0.002  | 1.11   | 1.73  | 0.015                                    | 0.013     | 0.007    | 0.007  | 0.010  | >50    | >50    |  |
| Q769.h5      | A     | 836               | 0.004  | 2.74   | 1.17  | 0.014                                    | 0.019     | 0.006    | 0.002  | 0.002  | >50    | >50    |  |
| Q842.d12     | A     | 7407              | 0.003  | 4.53   | 8.99  | 0.006                                    | 0.015     | 0.002    | 0.005  | 0.001  | 0.016  | 0.026  |  |
| QH209.14M.A2 | A     | 1490              | 1.13   | 1.45   | 5.93  | 0.024                                    | 0.011     | 0.008    | >50    | >50    | >50    | >50    |  |
| RW020.2      | A     | 1341              | 0.010  | 1.30   | 8.21  | 0.303                                    | 0.144     | 0.020    | 0.103  | 0.070  | 0.002  | 0.008  |  |
| UG037.8      | A     | 2490              | 0.026  | 0.039  | 0.504 | 0.035                                    | 0.056     | 0.020    | 0.021  | 0.0008 | 0.065  | 0.018  |  |
| 3301.V1.C24  | AC    | 9904              | 0.348  | 2.81   | 8.64  | 0.084                                    | 0.055     | 0.046    | 0.281  | 0.023  | 0.009  | 0.174  |  |
| 3589.V1.C4   | AC    | 143               | 0.010  |        | 1.94  | 0.073                                    | 0.351     | 0.061    | 0.025  | 0.728  | >50    | 0.028  |  |
| 6540.v4.c1   | AC    | 3626              | 7.73   | 2.62   | 14.3  | >50                                      | >50       | >50      | 0.035  | 0.017  | >50    | 3.13   |  |
| 6545.V3.C13  | AC    | 5118              | 0.722  | 1.61   | 6.07  |                                          | >50       | >50      |        |        |        |        |  |
| 6545.V4.C1   | AC    | 3797              | 4.92   | 1.54   | 12.5  | >50                                      | >50       | >50      | 0.095  | 0.068  | >50    | >50    |  |
| 0815.V3.C3   | ACD   | 465               | 0.005  | 0.190  | 1.66  | 0.036                                    | 0.055     | 0.018    | >50    | >50    | 0.020  | 0.036  |  |
| 6095.V1.C10  | ACD   | 7918              | >50    | 0.0006 | 0.004 | 0.464                                    | 0.601     | 0.096    | 0.242  | 0.023  | 37.3   | >50    |  |
| 3468.V1.C12  | AD    | 12304             | 0.004  | 0.366  | 0.964 | 0.040                                    | 0.104     | 0.073    | 2.09   | 2.38   | 0.042  | >50    |  |
| Q168.a2      | AD    | 509               | 0.009  | 0.768  | 18.7  | 0.140                                    | 0.138     | 0.050    | 0.106  | 0.031  | >50    | >50    |  |
| 620345.c1    | AE    | 187               | >50    | 0.748  | 0.469 | >50                                      | >50       | >50      | 0.393  | >50    | >50    | >50    |  |
| C1080.c3     | AE    | 8632              | 0.0009 | 0.038  | 0.598 | 1.50                                     | 0.539     | 0.096    | 0.004  | 0.001  | >50    | 0.117  |  |
| C2101.c1     | AE    | 12603             | 0.002  | 0.671  | 2.45  | 0.097                                    | 2.38      | 0.064    | 0.026  | 0.009  | >50    | 0.010  |  |
| C3347.c11    | AE    | 32066             | 0.022  | 0.016  | 0.161 | 0.037                                    | 0.055     | 0.029    | 0.038  | 0.006  | >50    | 0.004  |  |
| C4118.09     | AE    | 25357             | 0.0006 | 0.498  | 5.26  | 0.110                                    | 0.035     | 0.019    | 0.037  | 0.021  | >50    | >50    |  |
| CNE3         | AE    | 70.5              | 0.939  | 1.36   | 2.23  | 3.56                                     | 1.99      | 0.125    | 0.079  | 0.173  | >50    | >50    |  |
| CNE5         | AE    | 38.3              | >50    | 1.13   | 2.99  | 0.228                                    | 0.329     | 0.386    | 0.023  | 0.023  | >50    | 0.096  |  |
| CNE55        | AE    | 22242             | 0.195  | 0.044  | 0.901 | 0.292                                    | 0.294     | 0.147    | 0.146  | 1.37   | >50    | >50    |  |
| CNE56        | AE    | 1145              | >50    | 0.024  | 0.207 | 0.442                                    | 0.483     | 0.075    | >50    | >50    | >50    | 25.0   |  |
| CNE59        | AE    | 3223              | >50    | 0.001  | 0.042 | 0.516                                    | 0.102     | 0.043    | 0.091  | 0.113  | >50    | >50    |  |

| Virus ID  | Clade | ID50  | IC50 ( $\mu\text{g ml}^{-1}$ ) |        |       |       |           |          |        |        |        |        |
|-----------|-------|-------|--------------------------------|--------|-------|-------|-----------|----------|--------|--------|--------|--------|
|           |       | N152  | 35O22                          | 10E8   | 4E10  | VRC01 | NIH 45-46 | 3BNC 117 | PG9    | PG16   | PGT121 | PGT128 |
| M02138    | AE    | 15153 | 0.217                          | 0.002  | 0.151 | 0.742 | 0.270     | 0.154    | 0.122  | 0.022  | >50    | >50    |
| R1166.c1  | AE    | 6893  | 2.29                           | 0.550  | 2.69  | 1.77  | 1.73      | 0.230    | 1.55   | 0.587  | >50    | >50    |
| R2184.c4  | AE    | 1474  | 0.013                          | 0.679  | 3.79  | 0.052 | 0.065     | 0.035    | 0.204  | 0.280  | >50    | 4.84   |
| R3265.c6  | AE    | 35.5  | >50                            | 5.10   | 15.6  | 0.731 | 0.019     | 0.020    | 1.30   | 0.036  | >50    | >50    |
| TH966.8   | AE    | 2803  | >50                            | 0.012  | 0.079 | 0.331 | 0.094     | 0.056    | 0.042  | 0.008  | >50    | 0.006  |
| TH976.17  | AE    | 3259  | 0.325                          | 0.339  | 0.213 | 0.066 | 0.116     | 0.025    | >50    | >50    | >50    | >50    |
| 235-47    | AG    | 457   | >50                            | 0.077  | 0.802 | 0.049 | 0.250     | 0.022    | 0.322  | 0.246  | 0.110  | >50    |
| 242-14    | AG    | 6609  | >50                            | 1.35   | >50   | >50   | >50       | >50      | 0.025  | 0.023  | >50    | >50    |
| 263-8     | AG    | 3500  | >50                            | 0.029  | 0.319 | 0.119 | 0.196     | 0.047    | 0.353  | 1.31   | 1.23   | 0.488  |
| 269-12    | AG    | 95876 | >50                            | 0.049  | 0.133 | 0.163 | 9.79      | 0.151    | 1.52   | 0.281  | 0.164  | 0.019  |
| 271-11    | AG    | 2733  | 0.711                          | 0.623  | 3.11  | 0.052 | 0.215     | 0.007    | 0.097  | 0.102  | 11.7   | >50    |
| 928-28    | AG    | 5652  | >50                            | 0.022  | 0.009 | 0.378 | 0.164     | 0.155    | 0.060  | 0.023  | 31.0   | >50    |
| DJ263.8   | AG    | 5021  | 0.021                          | 0.010  | 0.081 | 0.072 | 0.018     | 0.025    | 0.100  | 0.048  | 0.064  | 20.0   |
| T250-4    | AG    | 24732 | >50                            | 0.658  | 0.361 | >50   | >50       | >50      | 0.0006 | 0.0006 | 0.001  | 0.003  |
| T251-18   | AG    | 6192  | 0.007                          | 0.132  | 9.42  | 3.58  | 1.36      | 0.203    | >50    | 10.5   | 10.8   | >50    |
| T253-11   | AG    | 243   | >50                            | 0.863  | 0.755 | 0.265 | 0.268     | 0.116    | 0.127  | 4.44   | >50    | 18.9   |
| T255-34   | AG    | 687   | 0.021                          | 0.153  | 0.023 | 0.252 | 0.779     | 0.051    | 0.015  | 0.005  | >50    | >50    |
| T257-31   | AG    | 89.7  | >50                            | 0.224  | 2.00  | 1.68  | 0.579     | 0.181    | 0.020  | 0.003  | >50    | >50    |
| T266-60   | AG    | 14457 | 0.795                          | >50    | 4.74  | 0.353 | 0.219     | 0.032    | 24.0   | >50    | 0.160  | 0.014  |
| T278-50   | AG    | 2342  | 3.00                           | 0.362  | 3.17  | >50   | >50       | >50      | 0.913  | 1.13   | >50    | 0.050  |
| T280-5    | AG    | 2740  | 3.18                           | 2.88   | 0.726 | 0.017 | 0.036     | 0.019    | 0.379  | 0.233  | 0.002  | 0.005  |
| T33-7     | AG    | 1731  | 0.632                          | 0.715  | 2.89  | 0.023 | 0.074     | 0.007    | 0.023  | 0.023  | >50    | >50    |
| 3988.25   | B     | 1332  | 0.119                          | 0.053  | 1.37  | 2.10  | 0.358     | >50      | 0.010  | 0.002  | 0.002  | 0.007  |
| 5768.04   | B     | 140   | 0.192                          | 2.01   | 15.0  | 0.099 | 0.074     | 0.201    | 0.073  | 0.020  | 0.039  | 4.50   |
| 6101.1    | B     | 1372  | >50                            | 0.0009 | 0.381 | 0.104 | 0.016     | 0.022    | >50    | >50    | 0.002  | 0.004  |
| 6535.3    | B     | 7906  | 0.114                          | 0.054  | 0.458 | 2.16  | 0.067     | 0.262    | 0.465  | >50    | 0.003  | 0.015  |
| 7165.18   | B     | 9575  | >50                            | 0.036  | 0.895 | >50   | >50       | 6.54     | >50    | >50    | 0.019  | 0.013  |
| 89.6.DG   | B     | 1943  | 0.459                          | 0.040  | 1.02  | 0.460 | 0.274     | 0.109    | >50    | >50    | 0.016  | 0.010  |
| AC10.29   | B     | 13018 | 0.833                          | 0.048  | 0.408 | 1.43  | 0.364     | 6.05     | 0.078  | 0.023  | 0.028  | 0.009  |
| ADA.DG    | B     | 15877 | >50                            | 0.016  | 0.656 | 0.424 | 0.112     | 0.086    | 0.342  | 0.023  | 0.002  | 0.017  |
| Bal.01    | B     | 1590  | 0.003                          | 0.715  | 6.74  | 0.102 | 0.017     | 0.012    | 0.052  | 8.00   | 0.011  | 0.300  |
| BaL.26    | B     | 5407  | 0.0006                         | 0.264  | 2.70  | 0.047 | 0.013     | 0.006    | 0.034  | 0.136  | 0.010  | 0.021  |
| BG1168.01 | B     | 167   | >50                            | 0.136  | 3.34  | 0.449 | 1.32      | 0.179    | >50    | >50    | >50    | >50    |
| BL01.DG   | B     | 1044  | 0.006                          | 0.136  | 4.68  | >50   | >50       | >50      | >50    | >50    | >50    | >50    |
| BR07.DG   | B     | 4626  | 0.0009                         | 0.031  | 2.01  | 1.67  | 0.362     | 0.135    | >50    | >50    | 0.064  | 2.28   |
| BX08.16   | B     | 74924 | 0.019                          | 0.099  | 0.469 | 0.281 | 0.366     | 0.102    | 0.024  | 0.062  | 0.002  | 0.006  |
| CAAN.A2   | B     | 1364  | 0.003                          | 1.37   | 8.49  | 1.06  | 0.205     | 0.673    | 13.0   | 7.43   | 0.005  | 0.102  |
| CNE10     | B     | 8422  | >50                            | 0.013  | 0.307 | 0.776 | 0.173     | 0.050    | 0.243  | 9.17   | 0.005  | 0.008  |
| CNE12     | B     | 2475  | 0.027                          | 0.117  | 1.11  | 0.785 | 0.516     | 0.085    | >50    | >50    | 0.002  | 0.017  |
| CNE14     | B     | 7920  | 0.005                          | 0.080  | 2.52  | 0.389 | 0.091     | 0.024    | >50    | >50    | 0.002  | 0.014  |
| CNE4      | B     | 13863 | 0.0009                         | 0.015  | 0.056 | 0.871 | 0.238     | 0.113    | >50    | >50    | 11.5   | 3.15   |
| CNE57     | B     | 1687  | 10.2                           | 0.010  | 0.156 | 0.535 | 0.182     | 0.066    | >50    | >50    | 0.008  | 0.009  |
| HO86.8    | B     | 1372  | 0.051                          | 0.104  | 0.344 | >50   | >50       | >50      | 0.014  | 0.001  | >50    | >50    |
| HT593.1   | B     | 7037  | >50                            | 0.016  | 0.397 | 0.438 | 0.099     | 0.229    | 0.271  | 0.153  | >50    | >50    |
| HXB2.DG   | B     | 6443  | 0.013                          | 0.002  | 0.043 | 0.040 | 0.009     | 0.037    | 0.553  | >50    | >50    | 11.0   |
| JRCSF.JB  | B     | 4641  | 0.002                          | 0.065  | 4.12  | 0.234 | 0.060     | 0.028    | 0.003  | 0.002  | 0.061  | 0.012  |

| Virus ID     | Clade | ID50  | IC50 ( $\mu\text{g ml}^{-1}$ ) |        |       |       |           |          |       |       |        |        |
|--------------|-------|-------|--------------------------------|--------|-------|-------|-----------|----------|-------|-------|--------|--------|
|              |       | N152  | 35O22                          | 10E8   | 4E10  | VRC01 | NIH 45-46 | 3BNC 117 | PG9   | PG16  | PGT121 | PGT128 |
| JRFL.JB      | B     | 860   | 0.013                          | 0.247  | 5.37  | 0.033 | 0.009     | <0.003   | >50   | >50   | 0.017  | 0.011  |
| MN.3         | B     | 48721 | 0.007                          | 0.0006 | 0.016 | 0.033 | 0.004     | >50      | >50   | >50   | >50    | >50    |
| PVO.04       | B     | 359   | 0.011                          | 1.78   | 1.99  | 0.386 | 0.148     | 0.074    | 6.24  | 19.8  | 0.132  | 0.010  |
| QH0515.01    | B     | 7984  | 0.033                          | 1.78   | 2.00  | 0.523 | 0.689     | 0.175    | >50   | >50   | 8.70   | >50    |
| QH0692.42    | B     | 6528  | 0.021                          | 0.358  | 1.60  | 1.16  | 0.991     | 0.275    | >50   | >50   | 0.940  | 0.046  |
| REJO.67      | B     | 9758  | 0.0001                         | 0.093  | 0.167 | 0.045 | 0.011     | 0.039    | 0.005 | 0.005 | 8.87   | >50    |
| RHPA.7       | B     | 1939  | >50                            | 0.640  | 13.3  | 0.047 | 0.022     | 0.019    | >50   | 1.32  | 0.014  | 0.029  |
| SC422.8      | B     | 3070  | 25.5                           | 0.196  | 1.49  | 0.132 | 0.031     | 0.049    | 0.535 | 1.20  | 0.098  | 2.41   |
| SF162.LS     | B     | 17317 | >50                            | 0.107  | 0.412 | 0.237 | 0.025     | 0.019    | >50   | >50   | 0.004  | 0.004  |
| SS1196.01    | B     |       | 0.062                          | 0.193  | 0.686 | 0.276 | 0.047     | 0.038    | 0.293 | 0.069 | 0.002  | 0.011  |
| THRO.18      | B     | 351   | 0.908                          | 0.048  | 1.77  | 4.42  | 1.88      | 2.80     | 15.0  | 0.975 | >50    | >50    |
| TRJO.58      | B     | 1231  | 0.002                          | 0.881  | 8.75  | 0.079 | 0.029     | 0.062    | 0.246 | 0.393 | 4.31   | 0.014  |
| TRO.11       | B     | 2773  | >50                            | 0.026  | 0.599 | 0.343 | 1.04      | 0.033    | 41.5  | 4.86  | 0.006  | 0.017  |
| WITO.33      | B     | 133   | >50                            | 0.247  | 1.20  | 0.112 | 0.037     | 0.030    | 0.023 | 0.023 | 0.787  | >50    |
| YU2.DG       | B     | 279   | 0.287                          | 0.895  | 16.0  | 0.055 | 0.031     | 0.029    | 3.69  | 0.041 | 0.068  | 0.058  |
| CH038.12     | BC    | 4565  | 1.10                           | 0.543  | 4.57  | 0.379 | 0.183     | >50      | 0.500 | 49.0  | 0.004  | 0.004  |
| CH070.1      | BC    | 3504  | >50                            | 1.13   | 21.4  | 18.7  | >50       | 7.89     | 0.006 | 0.002 | 0.003  | 0.027  |
| CH117.4      | BC    | 8831  | 0.0006                         | 0.146  | 0.343 | 0.059 | 0.022     | 0.663    | 0.008 | 0.005 | >50    | >50    |
| CH181.12     | BC    | 4947  | >50                            | 0.287  | 5.45  | 0.540 | 0.189     | 0.124    | 0.008 | 0.002 | 0.007  | 0.018  |
| CNE15        | BC    | 29955 | >50                            | 0.802  | 3.36  | 0.080 | 0.052     | >50      | 0.023 | 0.023 | 19.0   | >50    |
| CNE40        | BC    | 43426 | 0.002                          | 0.0006 | 0.003 | 0.425 | 0.320     | 0.116    | 1.16  | 49.0  | 0.224  | >50    |
| CNE7         | BC    | 82869 | 0.004                          | 0.034  | 0.128 | 0.540 | 0.147     | >50      | 1.66  | 0.393 | 0.032  | 0.058  |
| 286.36       | C     |       | 0.001                          | 1.05   | 0.988 | 0.103 | 0.953     | 0.067    | 0.071 | 0.005 | 0.002  | 0.014  |
| 288.38       | C     | 1949  | >50                            | 0.580  | 0.456 | 1.52  | 0.128     | 0.063    | 3.14  | 0.186 | 0.006  | 0.019  |
| 0013095-2.11 | C     | 1930  | >50                            | 0.003  | 0.078 | 0.142 | 0.019     | 0.208    | 0.023 | 0.023 | >50    | >50    |
| 001428-2.42  | C     | 2688  | >50                            | 0.750  | 9.10  | 0.023 | 0.009     | 0.010    | 0.023 | 0.023 | 0.023  | 0.039  |
| 0077_V1.C16  | C     | 1658  | 0.003                          | 1.19   | 0.886 | 1.04  | 0.308     | >50      | 0.091 | 0.023 | >50    | >50    |
| 00836-2.5    | C     | 265   | >50                            | 0.492  | 1.43  | 0.128 | 0.015     | >50      | 49.0  | >50   | 31.8   | >50    |
| 0921.V2.C14  | C     | 46    | >50                            | 0.773  | 5.63  |       | 0.181     | 0.243    |       |       | >50    | >50    |
| 16055-2.3    | C     | 7672  | >50                            | 0.571  | 4.12  | 0.105 | 0.068     | 3.24     | 0.014 | 0.005 | 1.02   | >50    |
| 16845-2.22   | C     | 11099 | >50                            | 0.001  | 0.459 | 2.41  | 3.19      | 29.6     | 2.38  | 27.8  | 9.41   | 0.233  |
| 16936-2.21   | C     | 8448  | 0.001                          | 0.166  | 1.79  | 0.109 | 0.023     | 0.059    | >50   | >50   | 0.003  | 0.030  |
| 25710-2.43   | C     | 9868  | >50                            | 0.013  | 0.376 | 0.545 | 0.202     | 0.100    | 0.038 | 0.023 | 0.014  | 0.021  |
| 25711-2.4    | C     | 4093  | >50                            | 0.448  | 6.24  | 0.712 | 0.718     | >50      | 1.50  | 0.037 | 0.010  | 0.019  |
| 25925-2.22   | C     | 3217  | >50                            | 0.287  | 2.23  | 0.559 | 0.141     | 0.136    | 0.023 | 0.023 | 0.024  | 0.014  |
| 26191-2.48   | C     | 35.2  | >50                            | 1.07   | 4.20  | 0.195 | 0.115     | 0.043    | 0.142 | 1.95  | 0.150  | 0.025  |
| 3168.V4.C10  | C     | 7844  | 0.038                          | 1.23   | 2.63  | 0.131 | 0.178     | 0.110    | 0.162 | 0.037 | 0.485  | >50    |
| 3637.V5.C3   | C     | 777   | 47.9                           | 1.66   | 3.51  | 4.09  | 1.77      | >50      | >50   | >50   | >50    | >50    |
| 3873.V1.C24  | C     | 1353  | >50                            | 3.81   | 3.05  | 0.954 | 0.141     | 6.97     | >50   | 12.2  | 0.015  | 0.015  |
| 6322.V4.C1   | C     | 8201  | 3.19                           | 1.80   | 7.95  | >50   | >50       | >50      | >50   | >50   | >50    | >50    |
| 6471.V1.C16  | C     | 3099  | >50                            | 4.62   | 23.1  | >50   | >50       | >50      | >50   | >50   | >50    | >50    |
| 6631.V3.C10  | C     | 49.4  | >50                            | 0.643  | >50   | >50   | >50       | >50      | >50   | >50   | >50    | 1.99   |
| 6644.V2.C33  | C     | 2654  | 0.0008                         | 0.002  | 0.781 | 0.164 | 0.071     | 0.033    | 0.033 | 35.3  | 0.018  | 0.100  |
| 6785.V5.C14  | C     | 17458 | >50                            | 0.435  | 1.96  | 0.332 | 0.311     | 0.195    | 0.023 | 0.023 | 0.019  | 0.019  |
| 6838.V1.C35  | C     | 719   | >50                            | 0.207  | 1.66  |       | 1.52      | 0.281    |       |       | 0.119  | >50    |
| 96ZM651.02   | C     | 7423  | >50                            | 0.004  | 0.113 | 0.525 | 0.416     | 0.443    | >50   | >50   | 0.009  | 0.131  |

| Virus ID        | Clade | ID50  | IC50 ( $\mu\text{g ml}^{-1}$ ) |       |       |       |           |          |       |       |        |        |
|-----------------|-------|-------|--------------------------------|-------|-------|-------|-----------|----------|-------|-------|--------|--------|
|                 |       | N152  | 35O22                          | 10E8  | 4E10  | VRC01 | NIH 45-46 | 3BNC 117 | PG9   | PG16  | PGT121 | PGT128 |
| BR025.9         | C     | 7102  | 0.006                          | 0.143 | 3.73  | 0.271 | 0.067     | >50      | 0.044 | 0.009 | 0.002  | 0.004  |
| CAP210.E8       | C     | 33972 | 0.042                          | 0.267 | 4.00  | >50   | >50       | 8.16     | 0.087 | 0.023 | >50    | >50    |
| CAP244.D3       | C     | 2859  | 20.9                           | 0.178 | 1.98  | 0.857 | 0.277     | 0.073    | 0.088 | 0.023 | >50    | >50    |
| CAP45.G3        | C     | 1909  | 0.010                          | 0.527 | 2.36  | 9.47  | >50       | 0.589    | 0.023 | 0.023 | 2.08   | >50    |
| CNE30           | C     | 3150  | >50                            | 0.424 | 1.73  | 0.927 | 0.624     | 0.291    | >50   | >50   | 0.061  | 0.853  |
| CNE31           | C     | 88.2  | >50                            | 1.14  | 3.12  | 0.962 | 0.253     | 9.95     | 13.5  | 2.51  | 0.789  | 14.9   |
| CNE53           | C     | 14560 | >50                            | 0.185 | 0.032 | 0.108 | 0.035     | 0.051    | 0.147 | >50   | 0.022  | 0.034  |
| CNE58           | C     | 368   | >50                            | 0.346 | 0.870 | 0.124 | 1.04      | 0.389    | 0.023 | 0.023 | >50    | 7.84   |
| DU123.06        | C     | 12736 | 6.33                           | 0.089 | 0.343 | 13.6  | >50       | 0.183    | 0.091 | 0.023 | 0.033  | 0.072  |
| DU151.02        | C     | 4533  | 0.094                          | 0.353 | 2.97  | 7.70  | >50       | >50      | 0.023 | 0.023 | 0.005  | 0.012  |
| DU156.12        | C     | 2021  | 11.7                           | 0.007 | 0.023 | 0.082 | 0.029     | 0.035    | 0.023 | 0.023 | 0.005  | 0.024  |
| DU172.17        | C     | 2564  | >50                            | 0.008 | 0.023 | >50   | >50       | 0.289    | 0.262 | 0.030 | 0.104  | 0.044  |
| DU422.01        | C     | 325   | 0.021                          | 1.06  | 1.65  | >50   | >50       | >50      | 0.303 | 0.023 | 0.164  | 0.175  |
| MW965.26        | C     | 42805 | 5.60                           | 0.001 | 0.025 | 0.038 | 0.024     | 0.005    | 1.99  | 0.961 | 0.011  | 0.315  |
| SO18.18         | C     | 2603  | >50                            | 0.422 | 8.79  | 0.071 | 0.028     | 0.032    | 0.061 | 0.023 | 0.002  | 0.056  |
| TV1.29          | C     | 241   | >50                            | 0.353 | 1.95  | >50   | >50       | >50      | 0.008 | 0.002 | 0.118  | 0.077  |
| TZA125.17       | C     | 11592 | >50                            | 0.405 | 0.431 | >50   | >50       | >50      | 0.231 | 0.024 | 9.96   | 1.20   |
| TZBD.02         | C     | 409   | >50                            | 1.67  | 2.32  | 0.072 | 0.011     | 45.9     | 0.266 | 0.025 | 0.005  | >50    |
| ZA012.29        | C     | 39    | >50                            | 0.827 | 5.80  | 0.250 | 0.098     | 0.063    | 27.0  | 0.631 | 0.005  | 0.028  |
| ZM106.9         | C     | 256   | 0.372                          | >50   | 16.1  | 0.248 | 0.058     | 0.082    | 0.639 | 1.10  | 0.005  | 0.024  |
| ZM109.4         | C     | 1856  | >50                            | 0.273 | 0.708 | 0.134 | 0.046     | 0.041    | 0.106 | 4.93  | 13.7   | >50    |
| ZM135.10a       | C     |       | >50                            | 0.338 | 0.034 | 1.28  | 0.280     | 0.067    | >50   | >50   | 1.50   | 30.0   |
| ZM176.66        | C     | 551   | >50                            | 0.184 | 0.669 | 0.038 | 0.096     | >50      | 0.007 | 0.002 | 13.8   | 0.021  |
| ZM197.7         | C     | 784   | >50                            | 0.046 | 0.425 | 0.624 | 0.314     | 0.398    | 0.414 | 0.650 | >50    | >50    |
| ZM214.15        | C     | 6130  | 0.034                          | 1.69  | 1.45  | 0.881 | 0.132     | 0.088    | >50   | >50   | 0.682  | 1.44   |
| ZM215.8         | C     | 2557  | 0.690                          | 0.017 | 0.641 | 0.276 | 0.015     | 0.010    | 0.023 | >50   | 0.014  | 0.039  |
| ZM233.6         | C     | 955   | 0.007                          | 0.103 | 2.06  | 4.25  | 5.44      | 0.202    | 0.023 | 0.023 |        |        |
| ZM249.1         | C     | 896   | 0.001                          | 0.787 | 2.75  | 0.082 | 0.038     | 0.039    | 0.033 | 0.073 | >50    | 10.7   |
| ZM53.12         | C     | 7255  | >50                            | 2.56  | 4.52  | 0.839 | 0.205     | 0.212    | 0.041 | 0.023 | 0.002  | >50    |
| ZM55.28a        | C     | 133   | 1.93                           | 2.31  | 8.79  | 0.144 | 0.085     | 0.040    | 0.571 | >50   | 0.070  | 0.029  |
| 3326.V4.C3      | CD    | 111   | >50                            | 1.18  | 1.93  | 0.073 | 4.27      | 48.1     | 0.023 | 0.023 | >50    | >50    |
| 3337.V2.C6      | CD    | 22394 | 0.002                          | 1.23  | 1.91  | 0.063 | 0.034     | 0.008    | >50   | >50   | 21.1   | 0.006  |
| 3817.v2.c59     | CD    |       | >50                            | 0.549 | 4.78  | >50   | >50       | 0.216    | 0.007 | 0.006 | >50    | 0.022  |
| 231965.c1       | D     | 7990  | >50                            | 8.03  | 21.7  | 0.487 | 0.060     | 0.035    | 1.51  | 4.72  | >50    | >50    |
| 247-23          | D     | 9426  | 0.006                          | 0.368 | 2.37  | 24.2  | 47.8      | 0.028    | 0.195 | >50   | >50    | >50    |
| 3016.v5.c45     | D     | 6403  | 9.85                           | 0.312 | 4.80  | 0.111 | >50       | 0.648    | 0.286 | >50   | >50    | >50    |
| 57128.vrc15     | D     | 11880 | 0.167                          | 0.203 | 1.93  | >50   | >50       | 0.432    | 0.104 | 0.162 | 2.16   | 0.069  |
| 6405.v4.c34     | D     | 19040 | 0.115                          | 0.325 | 3.92  | 2.63  | 0.731     | 0.171    | >50   | >50   | 0.019  | 6.86   |
| A03349M1.vrc4a  | D     | 15192 | 0.122                          | 0.292 | 3.12  | 4.66  | >50       | 0.512    | >50   | >50   | 0.013  | 0.018  |
| NKU3006.ec1     | D     | 12585 | 0.008                          | 0.588 | 5.83  | 0.506 | 0.615     | 0.089    | >50   | >50   | >50    | 45.0   |
| UG021.16        | D     | 7703  | >50                            | 0.022 | 0.196 | 0.266 | 1.48      | 0.410    | >50   | >50   |        |        |
| UG024.2         | D     | 11754 | >50                            | 0.013 | 0.091 | 0.106 | >50       | 0.057    | 3.94  | >50   | >50    | >50    |
| X2088.c9        | G     | 8786  | 3.62                           | >50   | >50   | >50   | >50       | >50      | >50   | >50   | 0.003  | >50    |
| SIVmac251.30.SC | NA    | <5    | >50                            | >50   | >50   | >50   | >50       | >50      | >50   | >50   | >50    | >50    |
| SVA.MLV         | NA    | <5    | >50                            | >50   | >50   | >50   | >50       | >50      | >50   | >50   | >50    | >50    |

<sup>a</sup>The data for N152 shows the ID<sub>50</sub> of serum against each virus. ID<sub>50</sub>>1000 is highlighted in red, 500<ID<sub>50</sub><1000 is in orange, and 100<ID<sub>50</sub><500 is in yellow. <sup>b</sup>The data for the monoclonal antibodies shows the IC<sub>50</sub>. IC<sub>50</sub><0.1  $\mu\text{g ml}^{-1}$  is in red, 0.1<IC<sub>50</sub><1  $\mu\text{g ml}^{-1}$  is in orange, 1<IC<sub>50</sub><10  $\mu\text{g ml}^{-1}$  is in yellow, and 10<IC<sub>50</sub><50  $\mu\text{g ml}^{-1}$  is in green.

Supplementary Table 4. 35O22 neutralization of pseudotyped HIV<sub>JRCSF</sub> alanine mutants.

|       | Domain | Virus ID     | IC <sub>50</sub> (μg ml <sup>-1</sup> ) <sup>a</sup> | Ratio |
|-------|--------|--------------|------------------------------------------------------|-------|
|       |        | WT           | 0.0106                                               | NA    |
| gp120 | C1     | E83A         | 0.0210                                               | 1.98  |
|       |        | V84A         | 0.0606                                               | 5.71  |
|       |        | V85A         | 0.0436                                               | 4.12  |
|       |        | L86A         | 0.1562                                               | 14.74 |
|       |        | E87A         | 0.0107                                               | 1.01  |
|       |        | N88A         | >20                                                  | >1886 |
|       |        | V89A         | >20                                                  | >1886 |
|       |        | T90A         | >20                                                  | >1886 |
|       |        | E91A         | 0.0136                                               | 1.29  |
|       |        | D92A         | 0.0126                                               | 1.19  |
|       | F93A   | No infection | NA                                                   |       |
|       | V1     | N134A        | 0.0073                                               | 0.69  |
|       |        | N141A        | 0.0049                                               | 0.46  |
|       |        | N156A        | 0.0046                                               | 0.44  |
|       | V2     | N160K        | 0.0365                                               | 3.44  |
|       |        | N186A        | 0.0071                                               | 0.67  |
|       | C2     | N197A        | 0.0018                                               | 0.17  |
|       |        | L226A        | 0.0143                                               | 1.35  |
|       |        | K227A        | >20                                                  | >1886 |
|       |        | C228A        | 0.0115                                               | 1.08  |
|       |        | N229A        | 0.0127                                               | 1.20  |
|       |        | N230A        | >20                                                  | >1886 |
|       |        | K231A        | 0.1303                                               | 12.29 |
|       |        | T232A        | 0.3346                                               | 31.57 |
|       |        | F233A        | 0.0176                                               | 1.66  |
|       |        | N234A        | 0.0138                                               | 1.30  |
|       |        | G235A        | 0.0078                                               | 0.74  |
|       |        | K236A        | 0.0239                                               | 2.25  |
|       |        | K237A        | 0.0139                                               | 1.31  |
|       |        | Q238A        | 0.0407                                               | 3.84  |
| C239A |        | No infection | NA                                                   |       |
| K240A |        | 0.0025       | 0.24                                                 |       |
| N241A |        | >20          | >1886                                                |       |
| V242A | 0.0224 | 2.11         |                                                      |       |
| S243A | >20    | >1886        |                                                      |       |
| T244A | 0.0275 | 2.60         |                                                      |       |
| V245A | 0.0155 | 1.46         |                                                      |       |
| Q246A | 0.0121 | 1.14         |                                                      |       |
| N262A | 0.0068 | 0.64         |                                                      |       |
| N276A | 0.0088 | 0.83         |                                                      |       |
| N280A | 0.0027 | 0.26         |                                                      |       |
| N289A | 0.0152 | 1.44         |                                                      |       |
| N295A | 0.0229 | 2.16         |                                                      |       |
| V3    | N301A  | 0.0140       | 1.32                                                 |       |



|             |              |            |               |                 |      |
|-------------|--------------|------------|---------------|-----------------|------|
|             |              | N302A      | 0.0153        | 1.44            |      |
|             | <b>C3</b>    | N332A      | 0.0065        | 0.61            |      |
|             |              | N339A      | 0.0347        | 3.27            |      |
|             |              | N355A      | 0.0969        | 9.14            |      |
|             |              | N392A      | 0.0089        | 0.84            |      |
|             | <b>V4</b>    | N396A      | 0.0106        | 1.00            |      |
|             |              | N411A      | 0.0117        | 1.11            |      |
|             |              | N425A      | 0.0063        | 0.60            |      |
|             | <b>C4</b>    | N448A      | 0.0185        | 1.75            |      |
|             |              | N461A      | 0.0238        | 2.24            |      |
|             |              | N478A      | 0.0189        | 1.78            |      |
|             |              | N553A      | 0.0128        | 1.21            |      |
|             | <b>NHR</b>   | N554A      | 0.0079        | 0.75            |      |
|             |              | N611A      | 0.0158        | 1.49            |      |
|             |              | N616A      | 0.0144        | 1.36            |      |
| <b>gp41</b> |              | <b>CHR</b> | D620A         | 0.0076          | 0.72 |
|             | S621A        |            | 0.0242        | 2.29            |      |
|             | I622A        |            | 0.0050        | 0.47            |      |
|             | W623A        |            | 0.0844        | 7.96            |      |
|             | N624A        |            | 0.0568        | 5.36            |      |
|             | <b>N625A</b> |            | <b>&gt;20</b> | <b>&gt;1886</b> |      |
|             | M626A        |            | 0.0154        | 1.45            |      |
|             | T627A        |            | 0.0034        | 0.32            |      |
|             | W628A        |            | 0.0145        | 1.37            |      |
|             | M629A        |            | 0.1015        | 9.58            |      |
|             | E630A        |            | 0.0366        | 3.45            |      |
|             | N637A        |            | 0.0147        | 1.39            |      |
|             | N656A        |            | 0.0237        | 2.24            |      |
|             | <b>TR</b>    |            | N671A         | 0.0390          | 3.68 |

### Double/Triple Mutants

| Virus ID          | IC <sub>50</sub> (µg ml <sup>-1</sup> ) <sup>a</sup> | Ratio |
|-------------------|------------------------------------------------------|-------|
| N230A N241A       | >20                                                  | >1886 |
| N241A N625A       | >20                                                  | >1886 |
| N230A N625A       | >20                                                  | >1886 |
| K227A N230A       | >20                                                  | >1886 |
| K227A N241A       | >20                                                  | >1886 |
| K227A S243A       | >20                                                  | >1886 |
| K227A N625A       | >20                                                  | >1886 |
| N230A S243A       | >20                                                  | >1886 |
| N241A S243A       | >20                                                  | >1886 |
| S243A N625A       | >20                                                  | >1886 |
| N230A N241A N625A | >20                                                  | >1886 |

<sup>a</sup>IC<sub>50</sub> values >30-fold compared to HIV wild-type virus are highlighted in yellow.

Supplementary Table 5. 35O22 neutralization of HIV<sub>LAI</sub> alanine mutants.

|       | Domain | Virus ID | IC <sub>50</sub> (μg ml <sup>-1</sup> ) <sup>a</sup> | Ratio |
|-------|--------|----------|------------------------------------------------------|-------|
|       |        | WT       | 0.0141                                               | NA    |
| gp120 | C1     | Y40F     | 0.0143                                               | 1.02  |
|       |        | L52V     | 0.0074                                               | 0.52  |
|       |        | F53V     | 0.0035                                               | 0.25  |
|       |        | N88A     | >1                                                   | >91   |
|       |        | V89A     | 0.4041                                               | 28.69 |
|       | C2     | T232Y    | 0.1901                                               | 13.50 |
|       |        | N234A    | 0.0197                                               | 1.40  |
|       |        | N241A    | 0.1480                                               | 10.51 |
|       | C5     | T244V    | 0.3240                                               | 23.00 |
|       |        | V488A    | 0.0053                                               | 0.38  |
|       |        | V489A    | 0.3527                                               | 25.04 |
|       |        | K490T    | 0.0203                                               | 1.44  |
|       |        | K490F    | 0.0142                                               | 1.01  |
|       |        | T499A    | 0.0730                                               | 5.19  |
|       |        | K500A    | 0.0315                                               | 2.23  |
|       |        | A501T    | 0.0075                                               | 0.53  |
|       |        | K502T    | 0.0359                                               | 2.55  |
|       |        | R504T    | 0.0533                                               | 3.78  |
|       |        | V505A    | 0.0091                                               | 0.65  |
|       |        | V505K    | 0.0200                                               | 1.42  |
| V506A | 0.0191 | 1.35     |                                                      |       |
| V506K | 0.0370 | 2.63     |                                                      |       |
| gp41  | NHR    | K588A    | 0.0091                                               | 0.65  |
|       |        | K588N    | 0.0064                                               | 0.46  |
|       |        | K588F    | 0.0067                                               | 0.47  |
|       |        | K601Q    | 0.0099                                               | 0.70  |
|       |        | K601A    | 0.0893                                               | 6.34  |
|       |        | A607N    | 0.0130                                               | 0.92  |
|       |        | N611D    | 0.0080                                               | 0.57  |
|       |        | N611A    | 0.0018                                               | 0.13  |
|       | N616Q  | 0.0046   | 0.32                                                 |       |
|       | N624Q  | 0.5010   | 35.57                                                |       |
|       | CHR    | N637Q    | 0.0048                                               | 0.34  |
| N637A |        | 0.0019   | 0.14                                                 |       |
| E647A |        | 0.0017   | 0.12                                                 |       |

<sup>a</sup>IC<sub>50</sub> values >10-fold compared to HIV wild-type virus are highlighted in yellow.

**Supplementary Table 6. Data collection and refinement statistics for 35O22 Fab.**

| 35O22 Fab                                            |                                  |
|------------------------------------------------------|----------------------------------|
| <b>Data collection</b>                               |                                  |
| Space group                                          | P4 <sub>1</sub> 2 <sub>1</sub> 2 |
| Cell dimensions                                      |                                  |
| <i>a</i> , <i>b</i> , <i>c</i> (Å)                   | 57.2, 57.2, 267.7                |
| <i>a</i> , <i>b</i> , <i>g</i> (°)                   | 90.0, 90.0, 90.0                 |
| Resolution (Å)                                       | 50-1.55 (1.58-1.55)*             |
| <i>R</i> <sub>sym</sub> or <i>R</i> <sub>merge</sub> | 11.1 (48.6)                      |
| <i>I</i> / <i>σ</i> <i>I</i>                         | 20.3 (2.9)                       |
| Completeness (%)                                     | 98.0 (92.8)                      |
| Redundancy                                           | 11.2 (5.0)                       |
| <b>Molecules/ASU</b>                                 | 1                                |
| <b>Refinement</b>                                    |                                  |
| Resolution (Å)                                       | 39.1-1.55                        |
| No. reflections                                      | 64,474                           |
| <i>R</i> <sub>work</sub> / <i>R</i> <sub>free</sub>  | 0.1665/0.1822                    |
| No. atoms                                            | 6,866                            |
| Protein                                              |                                  |
| Ligand/ion                                           | 0                                |
| Water                                                | 449                              |
| <i>B</i> -factors                                    |                                  |
| Protein                                              | 32.75                            |
| Ligand/ion                                           | 0                                |
| Water                                                | 38.59                            |
| R.m.s. deviations                                    |                                  |
| Bond lengths (Å)                                     | 0.005                            |
| Bond angles (°)                                      | 1.035                            |
| <b>PDB ID</b>                                        | 4TOY                             |

\*Values in parentheses are for highest-resolution shell.  
The dataset was collected from a single crystal.

1. **Supplementary Table 7. 35O22 neutralizing activity with reversion of an 8 amino acid FR3 insertion to germline**

| Clade                                                  | Virus ID      | Monoclonal antibody <sup>a</sup> |            | Fold change <sup>b</sup> |
|--------------------------------------------------------|---------------|----------------------------------|------------|--------------------------|
|                                                        |               | 35O22                            | 35O22 d8aa |                          |
| A                                                      | KER2018       | 0.004                            | >20        | >4933                    |
|                                                        | RWO20.2       | 0.010                            | 1.110      | >114                     |
|                                                        | Q168.a2       | 0.009                            | >20        | >2317                    |
|                                                        | Q769.d22      | 0.002                            | >20        | >8029                    |
|                                                        | Q769.h5       | 0.004                            | >20        | >4765                    |
| B                                                      | JRFL.JB       | 0.013                            | 0.060      | 4.7                      |
|                                                        | BaL.01        | 0.003                            | 0.023      | 6.8                      |
|                                                        | YU2.DG        | 0.287                            | >20        | >70                      |
|                                                        | PVO.04        | 0.011                            | 0.400      | 36.5                     |
|                                                        | TRO.11        | >50                              | >20        | NA                       |
|                                                        | CAAN.A2       | 0.003                            | 0.482      | 142.1                    |
|                                                        | TRJO.58       | 0.002                            | 0.005      | 2.2                      |
|                                                        | THRO.18       | 0.908                            | >20        | >22                      |
|                                                        | BG1168.1      | >50                              | >20        | NA                       |
| 6101.1                                                 | >50           | >20                              | NA         |                          |
| C                                                      | ZA012.29      | >50                              | >20        | NA                       |
|                                                        | DU156.12      | 11.700                           | >20        | >2                       |
|                                                        | DU422.01      | 0.021                            | >20        | >971                     |
|                                                        | ZM106.9       | 0.372                            | >20        | >54                      |
|                                                        | ZM55.28a      | 1.930                            | >20        | >10                      |
| Control                                                | SIVmac251.SG3 | >50                              | >50        | >50                      |
| Geometric Mean IC <sub>50</sub> (µg ml <sup>-1</sup> ) |               | 0.031                            | 0.107      | 3.5                      |
| Median IC <sub>50</sub> (µg ml <sup>-1</sup> )         |               | 0.010                            | 0.230      | 22.0                     |

<sup>a</sup>Concentration is µg ml<sup>-1</sup>. IC<sub>50</sub><0.1 µg ml<sup>-1</sup> is in red, 0.1<IC<sub>50</sub><1 µg ml<sup>-1</sup> is in orange, 1<IC<sub>50</sub><10 µg ml<sup>-1</sup> is in yellow, and 10<IC<sub>50</sub><50 µg ml<sup>-1</sup> is in green.

<sup>b</sup>Fold change=IC<sub>50</sub> of 35O22 d8aa / IC<sub>50</sub> of 35O22. Fold changes >10 are highlighted in yellow.

**Supplementary Table 8. Conservation of N-linked glycosylation sequons in HIV-1 Env.**

| Residue number |      |                            | Residue number |      |                            | Residue number |      |                            |
|----------------|------|----------------------------|----------------|------|----------------------------|----------------|------|----------------------------|
| Alignment      | HXB2 | % Glycan Conservation<br>n | Alignment      | HXB2 | % Glycan Conservation<br>n | Alignment      | HXB2 | % Glycan Conservation<br>n |
| 44             | 29   | 3.8                        | 272            | -    | 6.75                       | 586            | 395  | 1.48                       |
| 78             | 49   | 9.85                       | 273            | -    | 3.82                       | 587            | 396  | 25.21                      |
| 125            | 88   | 98.59                      | 274            | -    | 1.55                       | 588            | 397  | 9.94                       |
| 170            | 130  | 60.56                      | 311            | -    | 1.24                       | 589            | 398  | 37.91                      |
| 172            | 132  | 1.13                       | 312            | -    | 2.42                       | 590            | 399  | 8.32                       |
| 173            | 133  | 16.69                      | 313            | -    | 4.97                       | 591            | 400  | 7.34                       |
| 174            | 134  | 3.45                       | 314            | -    | 7.2                        | 592            | 401  | 8.25                       |
| 175            | 135  | 26.35                      | 315            | -    | 11.04                      | 593            | 402  | 20.49                      |
| 176            | 136  | 15.92                      | 316            | -    | 13.6                       | 594            | 403  | 11.37                      |
| 177            | 137  | 24.76                      | 317            | 187  | 32.45                      | 595            | 404  | 12.4                       |
| 178            | 138  | 16.3                       | 318            | 188  | 24.45                      | 596            | 405  | 8.68                       |
| 179            | 139  | 15.45                      | 327            | 197  | 97.84                      | 597            | 406  | 5.72                       |
| 180            | 140  | 18.5                       | 366            | 229  | 1.69                       | 598            | 407  | 5.16                       |
| 181            | 141  | 15.83                      | 367            | 230  | 32.68                      | 599            | 408  | 4.2                        |
| 182            | 142  | 13.79                      | 369            | 232  | 3.02                       | 600            | -    | 1.62                       |
| 183            | -    | 9.33                       | 371            | 234  | 79.7                       | 613            | -    | 1.66                       |
| 184            | -    | 5.63                       | 380            | 241  | 97                         | 614            | 409  | 3.05                       |
| 185            | -    | 4.38                       | 404            | 262  | 99.41                      | 615            | 410  | 9.99                       |
| 186            | -    | 3.12                       | 411            | 268  | 1.17                       | 616            | 411  | 45.96                      |
| 187            | -    | 1.97                       | 424            | 276  | 94.7                       | 617            | 412  | 1.24                       |
| 188            | -    | 1.29                       | 440            | 289  | 69.36                      | 618            | 413  | 24.01                      |
| 189            | -    | 1.08                       | 446            | 293  | 5.84                       | 667            | 442  | 26.89                      |
| 215            | -    | 1.27                       | 450            | 295  | 60.12                      | 669            | 444  | 6.57                       |
| 216            | -    | 1.9                        | 456            | 301  | 93.13                      | 675            | 446  | 7.22                       |
| 217            | -    | 3.17                       | 498            | 332  | 71.61                      | 677            | 448  | 86.4                       |
| 218            | -    | 4.1                        | 500            | 334  | 22.06                      | 693            | 460  | 14.82                      |
| 219            | -    | 7.62                       | 510            | 337  | 4.31                       | 694            | 461  | 26.68                      |
| 220            | 143  | 11.44                      | 512            | 339  | 65.79                      | 695            | 462  | 31.82                      |
| 221            | 144  | 10.88                      | 517            | 344  | 2.91                       | 696            | 463  | 20.28                      |
| 222            | 145  | 12.8                       | 530            | 354  | 9.05                       | 697            | -    | 3.87                       |
| 223            | 146  | 5.39                       | 539            | 355  | 4.78                       | 698            | -    | 1.62                       |
| 224            | 147  | 9.8                        | 540            | 356  | 73.62                      | 733            | -    | 1.83                       |
| 225            | 148  | 4.45                       | 542            | 358  | 4.99                       | 734            | -    | 28.14                      |
| 226            | 149  | 12.71                      | 544            | 360  | 3.42                       | 736            | 465  | 27.15                      |
| 227            | 150  | 1.81                       | 546            | 362  | 35.19                      | 919            | 611  | 98.41                      |
| 234            | 156  | 95.85                      | 553            | 363  | 8.3                        | 937            | 616  | 91.07                      |
| 238            | 160  | 91.3                       | 577            | 386  | 86.96                      | 939            | 618  | 4.48                       |
| 269            | 185  | 7.76                       | 583            | 392  | 78.8                       | 949            | 625  | 95.99                      |
| 270            | 186  | 15.76                      | 584            | 393  | 2.06                       | 962            | 637  | 96.2                       |
| 271            | -    | 5.89                       | 585            | 394  | 4.64                       | 1003           | 674  | 13.22                      |

The conservation (in percent, on a color scale of white to red) of N-linked glycosylation sequons at HIV-1 gp140 residues is based on analysis of 4265 HIV-1 sequences (<http://www.hiv.lanl.gov/content/sequence/NEWALIGN/align.html>). Shown are gp140 residue positions where an N-linked glycosylation sequon is present in more than 1% of the sequences.
